# Supplementary material
Source: PubMed Central journal article supplement (PMC3043595)
Supplement: NIHMS267535-supplement-Supp__Fig__1.pdf [file NIHMS267535-supplement-Supp__Fig__1.pdf]

## Supplementary Figure 1

Verification of the sequencing test by Hpy188I and Hpy188III digestion after two rounds of PCR with the 4q-selective primer Bts-R in the first round of PCR. We digested 500 ng of DNA with 20 U of BtsI (New England Biolab) at 50 °C overnight, followed by two rounds of PCR, and then differential digestion with Hpy188I and Hpy188III. The first round of PCR of 40 ng of the digested DNA used 0.1  $\mu$ M of the primers 2-F and Bts-R for 35 cycles. Then 1  $\mu$ l of the first-round PCR product was amplified for 45 cycles using 1.0  $\mu$ M primer 1-F and primer 1-R. PCR conditions and digestion with Hpy188I and Hpy188III were as described in Patients and Materials.

## Supplementary Figure 1

### Verifying the DNA sequencing haplotype test

#### 2-round PCR

1<sup>st</sup> round included the 4q-specific primer, Bts-R

Hpy188I/III digestion of the final PCR product

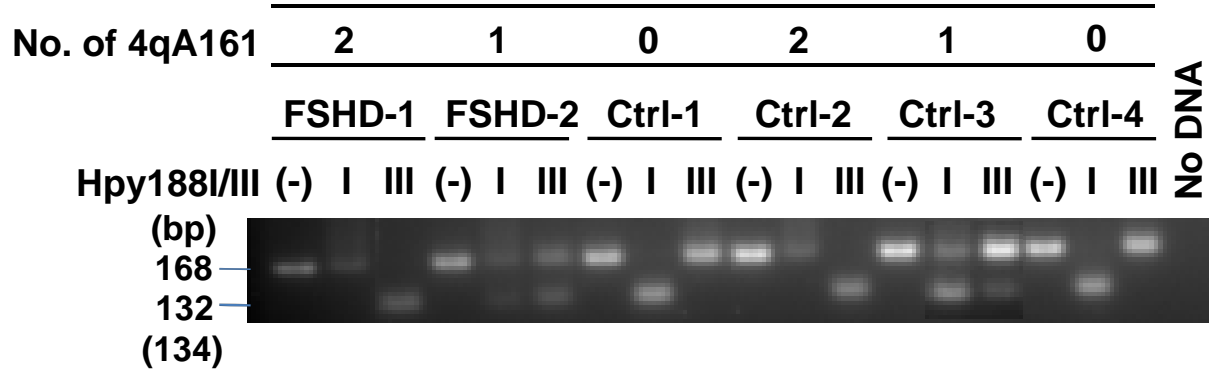

4qA161: Hpy188III<sup>S</sup> Hpy188I<sup>R</sup> TCTG**G**A

Other haplotypes: Hpy188I<sup>S</sup> Hpy188III<sup>R</sup> TCTG**A**A

Verification of the sequencing test by Hpy188I and Hpy188III digestion after two rounds of PCR with the 4q-selective primer Bts-R in the first round of PCR. We digested 500 ng of DNA with 20 U of BtsI (New England Biolab) at 50 ° C overnight, followed by two rounds of PCR, and then differential digestion with Hpy188I and Hpy188III. The first round of PCR of 40 ng of the digested DNA used 0.1 μM of the primers 2-F and Bts-R for 35 cycles. Then 1 μl of the first-round PCR product was amplified for 45 cycles using 1.0 μM primer 1-F and primer 1-R. PCR conditions and digestion with Hpy188I and Hpy188III were as described in Patients and Materials. Special caution needs to be used in a 2-round PCR test to avoid contamination with the PCR product. As for all PCRs, no-DNA controls processed last were included in each set of assays.
